# Supplementary material for: Handedness in Neandertals from the El Sidrón (Asturias, Spain): Evidence from Instrumental Striations with Ontogenetic Inferences
Source: PubMed Central journal article supplement (PMC3646041; doi:10.1371/journal.pone.0062797), 2013-05-06
Supplement: pone.0062797.s001.pdf [file pone.0062797.s001.pdf]

**Table S1. List of the El Sidrón specimens analyzed in this study.**

Which includes their catalogue number, anatomical identification and individuals' assignment.

| <b>INDIVIDUAL</b> | <b>INVENTORY NUMBER</b> | <b>ANATOMICAL IDENTIFICATION</b> |
|-------------------|-------------------------|----------------------------------|
| ADULT 1           | SD-1202                 | ULC                              |
| MALE              | SD-441                  | ULI2                             |
|                   | SD-1201                 | ULI1                             |
|                   | SD-313                  | URI1                             |
|                   | SDR-141                 | URI2                             |
|                   | SD-1010                 | URC                              |
|                   | SDR-006b                | LLC                              |
|                   | SDR-006c                | LRI1                             |
|                   | SDR-006d                | LRI2                             |
|                   | SDR-006e                | LRC                              |
|                   | SD-299a                 | LLI2                             |
| ADULT 2           | SD-1427g                | ULC                              |
| MALE              | SD-1427h                | ULI2                             |
|                   | SD-1427i                | URC                              |
|                   | SD-1240                 | URI2                             |
|                   | SD-1439                 | ULI1                             |
|                   | SD-1422                 | URI1                             |
|                   | SDR-007a                | LRI2                             |
|                   | SDR-014                 | LLI2                             |
|                   | SD-703                  | LRI1                             |
| ADULT 3           | SD-1220                 | ULC                              |
| FEMALE            | SD-1222                 | LRI2                             |
|                   | SD-1217b                | LRI1                             |
| ADULT 4           | SD-1661                 | URC                              |
| FEMALE            | SD-1572                 | ULI1                             |

|              |          |      |
|--------------|----------|------|
|              | SD-1018  | ULC  |
|              | SD-209   | LRC  |
|              | SD-355   | LRI2 |
|              | SD-599a  | LRI1 |
|              | SD-599b  | LLI1 |
|              | SD-757   | LLI2 |
| ADULT 5      | SD-2010g | ULC  |
| FEMALE       | SD-2010h | ULI2 |
|              | SD-2010i | ULI1 |
|              | SD-2010j | URI1 |
|              | SD-2010k | URI2 |
|              | SD-2010l | URC  |
|              | SD-1327a | LRI2 |
|              | SD-1327b | LRI1 |
|              | SD-1327c | LLI1 |
|              | SD-1327d | LLI2 |
|              | SD-1327e | LLC  |
| ADULT 6      | SD-311   | ULI1 |
| MALE         | SD-1161  | ULC  |
|              | SD-753   | LLC  |
|              | SD-1574  | LLI2 |
| ADULT 7      | SD-1707  | URI2 |
| UNKNOWN      | SD-582   | URI1 |
| ADOLESCENT 1 | SD-913   | ULC  |
| MALE         | SD-1019  | LRI2 |
|              | SD-278   | LRI1 |
| ADOLESCENT 2 | SDR-013  | URI2 |
| UNKNOWN      | SD-331a  | URI1 |
|              | SD-331b  | ULI1 |

|              |          |       |
|--------------|----------|-------|
|              | SD-370b  | LRI2  |
| ADOLESCENT 3 | SD-568   | ULI2  |
| MALE         | SD-277   | ULI1  |
|              | SD-1107  | ULC   |
| JUVENILE 1   | SD-1721  | dURC  |
| MALE         | SD-1875  | URI1  |
|              | SD-1719  | ULI1  |
|              | SD-1600e | dLLC  |
|              | SD-1660e | dLRC  |
|              | SD-1660f | LRI1  |
|              | SD-1716  | dLRI2 |
|              | SD-322   | LLI1  |

Estalrich A, Rosas A: Handedness in Neandertals from the El Sidrón (Asturias, Spain): Evidence from Instrumental Striations with Ontogenetic Inferences.
